# Supplementary material
Source: publisher figshare collection journal article supplement (https://acs.figshare.com/ndownloader/files/13728926)

# checkCIF/PLATON report

You have not supplied any structure factors. As a result the full set of tests cannot be run.

THIS REPORT IS FOR GUIDANCE ONLY. IF USED AS PART OF A REVIEW PROCEDURE FOR PUBLICATION, IT SHOULD NOT REPLACE THE EXPERTISE OF AN EXPERIENCED CRYSTALLOGRAPHIC REFEREE.

No syntax errors found.      CIF dictionary      Interpreting this report

## Datablock: lem44

---

|                        |                                   |                       |             |
|------------------------|-----------------------------------|-----------------------|-------------|
| Bond precision:        | C-C = 0.0080 A                    | Wavelength=0.71073    |             |
| Cell:                  | a=16.1858(17)                     | b=16.1858(17)         | c=33.941(4) |
|                        | alpha=90                          | beta=90               | gamma=120   |
| Temperature:           | 110 K                             |                       |             |
|                        | Calculated                        | Reported              |             |
| Volume                 | 7701(2)                           | 7700.6(19)            |             |
| Space group            | P 31 2 1                          | P 31 2 1              |             |
| Hall group             | P 31 2"                           | P 31 2"               |             |
| Moiety formula         | C50 H63.24 N4 O8 Ru S [+ solvent] | C50 H63.24 N4 O8 Ru S |             |
| Sum formula            | C50 H63.24 N4 O8 Ru S [+ solvent] | C50 H63.24 N4 O8 Ru S |             |
| Mr                     | 981.41                            | 981.41                |             |
| Dx, g cm <sup>-3</sup> | 1.270                             | 1.270                 |             |
| Z                      | 6                                 | 6                     |             |
| Mu (mm <sup>-1</sup> ) | 0.399                             | 0.399                 |             |
| F000                   | 3091.4                            | 3091.0                |             |
| F000'                  | 3085.82                           |                       |             |
| h,k,lmax               | 19,19,40                          | 19,19,40              |             |
| Nref                   | 9163[ 5100]                       | 9141                  |             |
| Tmin,Tmax              | 0.931,0.953                       | 0.900,0.954           |             |
| Tmin'                  | 0.898                             |                       |             |

Correction method= # Reported T Limits: Tmin=0.900 Tmax=0.954  
AbsCorr = MULTI-SCAN

Data completeness= 1.79/1.00      Theta(max)= 25.114

R(reflections)= 0.0376( 8294)      wR2(reflections)= 0.0839( 9141)

S = 1.021      Npar= 568

---

The following ALERTS were generated. Each ALERT has the format

**test-name\_ALERT\_alert-type\_alert-level.**

Click on the hyperlinks for more details of the test.

### Alert level C

|                   |                                      |        |    |                           |     |              |
|-------------------|--------------------------------------|--------|----|---------------------------|-----|--------------|
| PLAT220_ALERT_2_C | Non-Solvent                          | Resd 1 | C  | Ueq(max)/Ueq(min) Range   | 5.4 | Ratio        |
| PLAT220_ALERT_2_C | Non-Solvent                          | Resd 1 | N  | Ueq(max)/Ueq(min) Range   | 3.4 | Ratio        |
| PLAT220_ALERT_2_C | Non-Solvent                          | Resd 1 | O  | Ueq(max)/Ueq(min) Range   | 3.2 | Ratio        |
| PLAT222_ALERT_3_C | Non-Solv.                            | Resd 1 | H  | Uiso(max)/Uiso(min) Range | 5.5 | Ratio        |
| PLAT230_ALERT_2_C | Hirshfeld Test Diff for              |        | C4 | --C29                     | .   | 5.5 s.u.     |
| PLAT309_ALERT_2_C | Single Bonded Oxygen (C-O > 1.3 Ang) |        |    |                           |     | 09 Check     |
| PLAT420_ALERT_2_C | D-H Without Acceptor                 |        | N4 | --H4                      | .   | Please Check |

### Alert level G

|                   |                                                  |  |  |                                  |        |              |
|-------------------|--------------------------------------------------|--|--|----------------------------------|--------|--------------|
| PLAT002_ALERT_2_G | Number of Distance or Angle Restraints on AtSite |  |  |                                  | 9      | Note         |
| PLAT007_ALERT_5_G | Number of Unrefined Donor-H Atoms                |  |  |                                  | 2      | Report       |
| PLAT012_ALERT_1_G | No                                               |  |  | _shelx_res_checksum Found in CIF |        | Please Check |
| PLAT066_ALERT_1_G | Predicted and Reported Tmin&Tmax Range           |  |  | Identical                        | ?      | Check        |
| PLAT068_ALERT_1_G | Reported F000 Differs from Calcd (or Missing)... |  |  |                                  |        | Please Check |
| PLAT171_ALERT_4_G | The CIF-Embedded .res File Contains EADP Records |  |  |                                  | 5      | Report       |
| PLAT172_ALERT_4_G | The CIF-Embedded .res File Contains DFIX Records |  |  |                                  | 2      | Report       |
| PLAT301_ALERT_3_G | Main Residue Disorder                            |  |  | .....(Resd 1 )                   | 6%     | Note         |
| PLAT304_ALERT_4_G | Non-Integer Number of Atoms in                   |  |  | ..... Resd 1                     | 127.24 | Check        |
| PLAT380_ALERT_4_G | Incorrectly? Oriented X(sp2)-Methyl Moiety       |  |  | .....                            | C26    | Check        |
| PLAT605_ALERT_4_G | Largest Solvent Accessible VOID in the Structure |  |  |                                  | 131    | A**3         |
| PLAT764_ALERT_4_G | Overcomplete CIF Bond List Detected (Rep/Expd)   |  |  | .                                | 1.11   | Ratio        |
| PLAT773_ALERT_2_G | Check long C-C Bond in CIF: C49                  |  |  | --C52                            | 1.93   | Ang.         |
| PLAT779_ALERT_4_G | Suspect or Irrelevant (Bond) Angle in CIF        |  |  | .... #                           | 129    | Check        |
|                   | C48 -C46 -C52                                    |  |  | 1.555 1.555 1.555                | 43.30  | Deg.         |
| PLAT779_ALERT_4_G | Suspect or Irrelevant (Bond) Angle in CIF        |  |  | .... #                           | 137    | Check        |
|                   | C53 -C46 -C49                                    |  |  | 1.555 1.555 1.555                | 44.20  | Deg.         |
| PLAT789_ALERT_4_G | Atoms with Negative _atom_site_disorder_group    |  |  | #                                | 13     | Check        |
| PLAT791_ALERT_4_G | Model has Chirality at C10                       |  |  | (Chiral SPGR)                    | S      | Verify       |
| PLAT791_ALERT_4_G | Model has Chirality at C29                       |  |  | (Chiral SPGR)                    | S      | Verify       |
| PLAT860_ALERT_3_G | Number of Least-Squares Restraints               |  |  | .....                            | 7      | Note         |
| PLAT868_ALERT_4_G | ALERTS Due to the Use of _smtbx_masks Suppressed |  |  |                                  | !      | Info         |
| PLAT933_ALERT_2_G | Number of OMIT Records in Embedded .res File     |  |  | ...                              | 4      | Note         |

0 **ALERT level A** = Most likely a serious problem - resolve or explain  
 0 **ALERT level B** = A potentially serious problem, consider carefully  
 7 **ALERT level C** = Check. Ensure it is not caused by an omission or oversight  
 21 **ALERT level G** = General information/check it is not something unexpected

3 ALERT type 1 CIF construction/syntax error, inconsistent or missing data  
 9 ALERT type 2 Indicator that the structure model may be wrong or deficient  
 3 ALERT type 3 Indicator that the structure quality may be low  
 12 ALERT type 4 Improvement, methodology, query or suggestion  
 1 ALERT type 5 Informative message, check

### Validation response form

Please find below a validation response form (VRF) that can be filled in and pasted into your CIF.

# start Validation Reply Form

\_vrf\_PLAT220\_lem44

;

PROBLEM: Non-Solvent Resd 1 C Ueq(max)/Ueq(min) Range 5.4 Ratio

```

RESPONSE: ...
;
_vrf_PLAT222_lem44
;
PROBLEM: Non-Solv. Resd 1 H Uiso(max)/Uiso(min) Range 5.5 Ratio
RESPONSE: ...
;
_vrf_PLAT230_lem44
;
PROBLEM: Hirshfeld Test Diff for C4 --C29 . 5.5 s.u.
RESPONSE: ...
;
_vrf_PLAT309_lem44
;
PROBLEM: Single Bonded Oxygen (C-O > 1.3 Ang) ..... 09 Check
RESPONSE: ...
;
_vrf_PLAT420_lem44
;
PROBLEM: D-H Without Acceptor N4 --H4 . Please Check
RESPONSE: ...
;
# end Validation Reply Form

```

---

It is advisable to attempt to resolve as many as possible of the alerts in all categories. Often the minor alerts point to easily fixed oversights, errors and omissions in your CIF or refinement strategy, so attention to these fine details can be worthwhile. In order to resolve some of the more serious problems it may be necessary to carry out additional measurements or structure refinements. However, the purpose of your study may justify the reported deviations and the more serious of these should normally be commented upon in the discussion or experimental section of a paper or in the "special\_details" fields of the CIF. checkCIF was carefully designed to identify outliers and unusual parameters, but every test has its limitations and alerts that are not important in a particular case may appear. Conversely, the absence of alerts does not guarantee there are no aspects of the results needing attention. It is up to the individual to critically assess their own results and, if necessary, seek expert advice.

### Publication of your CIF in IUCr journals

A basic structural check has been run on your CIF. These basic checks will be run on all CIFs submitted for publication in IUCr journals (*Acta Crystallographica*, *Journal of Applied Crystallography*, *Journal of Synchrotron Radiation*); however, if you intend to submit to *Acta Crystallographica Section C* or *E* or *IUCrData*, you should make sure that full publication checks are run on the final version of your CIF prior to submission.

### Publication of your CIF in other journals

Please refer to the *Notes for Authors* of the relevant journal for any special instructions relating to CIF submission.

---

**PLATON version of 19/10/2018; check.def file version of 15/10/2018**

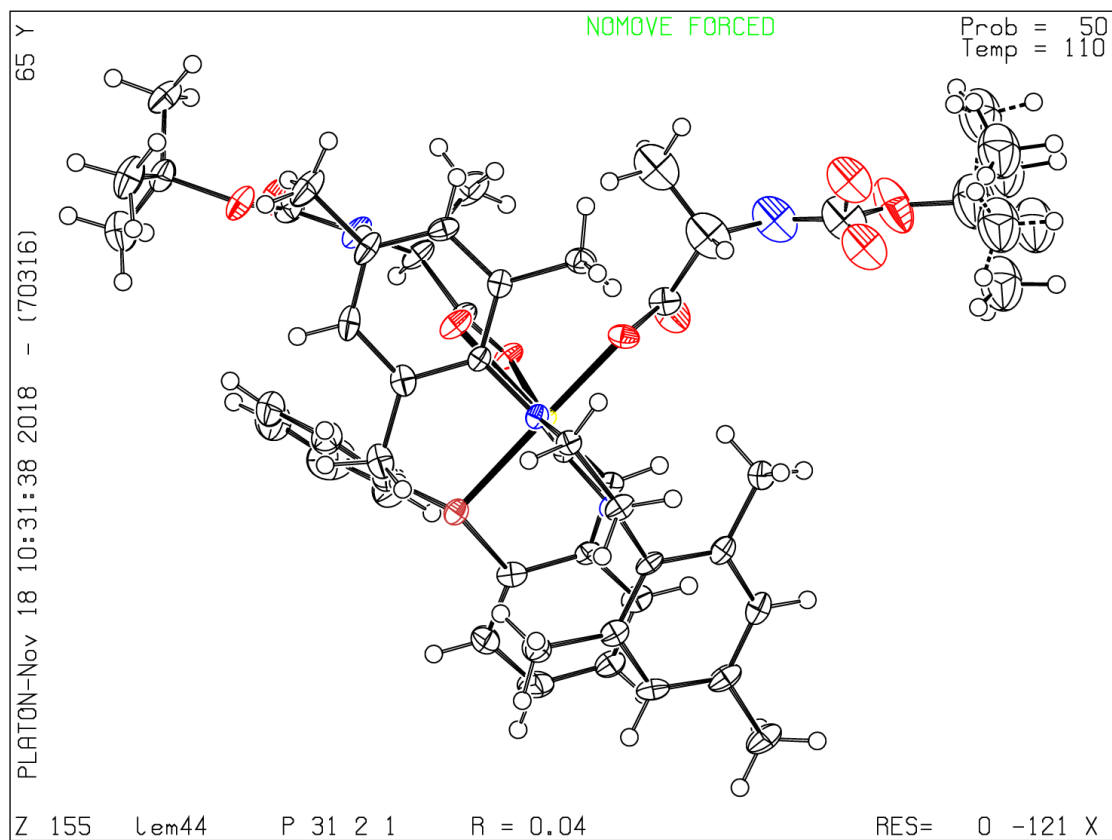

Supplement: Supplementary file 1 [file 13728926]
